# Supplementary material
Source: Springer Nature journal article supplement (https://www.springermedizin.de/resource/supplementary/12888_2007_460_MOESM2_ESM.pdf/9483332)

4 periods (P 1-P 4)

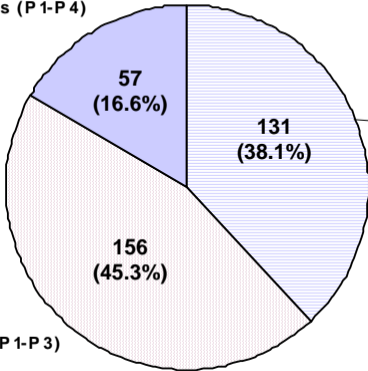

57  
(16.6%)

131  
(38.1%)

2 periods only (P 1-P 2)

3 periods only (P 1-P 3)

Supplement: MOESM2 [file 9483332]
